# Supplementary material for: Transcriptome Analysis of Quantitative Resistance-Specific Response upon Ralstonia solanacearum Infection in Tomato
Source: PLoS One. 2012 Oct 5;7(10):e46763. doi: 10.1371/journal.pone.0046763 (PMC3465262; doi:10.1371/journal.pone.0046763)
Supplement: Table S1 — Genes with altered expression levels in response to R. solanacearum in resistant tomato cv. LS-89. (XLS) [file pone.0046763.s003.xls]

## Sheet: supplement table
Table S1. Genes with altered expression levels in response to R. solanacearum in resistant tomato cv. LS-89.
Probe Set ID	Description a	Ponderosa						LS-89					Molecular function f	Narrower class f
		Signal Log b		Fold change c	P d	q e		Signal Log b		Fold change c	P d	q e
		Mock	R.s					Mock	R.s
Les.3653.1.S1_at	Class III acidic beta(1,3)glucanase (PR-Q'a)	0.0900766	0.815948	1.6539	-	-		1.25546	8.05899	111.703	0.000168976	0.0172889	Catalytic	Hydrolase
Les.5934.1.S1_at	Lipid desaturase-like protein	4.05512	4.33404	1.21328	0.632126	0.865544		4.56369	11.1927	98.9774	0.000901205	0.0414184	Catalytic	Oxidoreductase
Les.129.1.S1_at	Divinyl ether synthase (DES)	2.06971	1.23991	-1.77744	-	-		1.49818	7.96807	88.6405	0.00121099	0.0491832	Catalytic	Oxidoreductase
LesAffx.8850.1.S1_at	Esterase, putative	5.03865	3.88733	-2.22117	0.200481	0.865544		4.98258	11.3168	80.6836	0.000957531	0.0414184	Catalytic	Hydrolase
Les.2560.1.S1_at	ACC oxidase 1 (ACO1)	4.76077	5.74091	1.97265	0.15859	0.865544		5.88987	11.4637	47.6308	0.000225301	0.0206671	Catalytic	Oxidoreductase
LesAffx.62420.1.S1_at	UDP-glucose:glucosyltransferase, putative	-0.333333	0.707557	2.0575	-	-		0.791633	6.3157	46.0161	0.00219669	0.0683467	Catalytic	Transferase
LesAffx.69808.1.S1_at	Calmodulin-binding family protein, putative	-0.824644	1.72584	5.85831	-	-		1.33107	6.19658	29.1516	0.000253464	0.0217505	Binding	-
Les.3575.1.S1_at	DNA-binding protein Pti5	5.04537	4.80563	-1.18078	0.709703	0.865544		5.00566	9.75395	26.8768	0.000197139	0.0194234	Transcription factor	-
Les.3683.1.S1_at	PR-5 family member PR-5x	2.30358	2.76947	1.38117	-	-		3.09393	7.79777	26.0613	0.000112651	0.0172889	Others or Unknown	-
LesAffx.71065.1.S1_at	Pathogenesis-related family protein, putative	2.02449	2.94766	1.89627	-	-		2.70405	7.20429	22.6312	0.000253464	0.0217505	Others or Unknown	-
Les.5177.1.S1_at	Indole-3-acetic acid amido synthetase (GH3 family protein), putative	0.43581	1.19015	1.68687	-	-		1.05536	5.51921	22.0674	0.000253464	0.0217505	Catalytic	Ligase
Les.3408.1.S1_at	PR (pathogenesis related) protein (PR1b1)	4.57772	4.62187	1.03108	0.933825	0.876337		7.49076	11.6017	17.2795	0.00236566	0.0719218	Others or Unknown	-
LesAffx.51300.1.S1_at	Unknown	4.31875	3.97051	-1.27301	0.409624	0.865544		4.30923	8.41443	17.2103	0.000112651	0.0172889	Others or Unknown	-
Les.3652.1.S1_at	Class III basic beta(1,3)glucanase (PR-Q'b)	8.77651	8.31116	-1.38065	0.283674	0.865544		6.75221	10.8313	16.9013	0.000112651	0.0172889	Catalytic	Hydrolase
LesAffx.11941.1.S1_at	Phytophthora-inhibited protease 1 (pip1)	3.69508	4.12019	1.34267	0.0987872	0.865544		4.66205	8.61897	15.5293	0.000112651	0.0172889	Catalytic	Hydrolase
LesAffx.66354.1.S1_at	Arogenate dehydrogenase, putative	0.410068	2.26429	3.61556	-	-		1.92361	5.86618	15.3756	0.00290075	0.0825306	Catalytic	Oxidoreductase
Les.131.1.S1_at	Putative glutathione S-transferase T1	3.95146	4.47375	1.43623	0.226414	0.865544		3.8187	7.66419	14.375	0.000225301	0.0206671	Catalytic	Transferase
Les.37.1.S1_at	Class II chitinase (Chi2;1)	5.81589	5.25355	-1.47666	0.256539	0.865544		5.94093	9.77382	14.25	0.000112651	0.0172889	Catalytic	Hydrolase
LesAffx.3059.1.S1_at	Transcription factor TSRF1	3.09665	3.11417	1.01222	-	-		2.78762	6.60295	14.0776	0.000168976	0.0172889	Transcription factor	-
Les.4829.1.S1_at	2-oxoglutarate-dependent dioxygenase (LeODD)	3.55394	4.7089	2.22679	0.125279	0.865544		3.83031	7.50602	12.7791	0.000112651	0.0172889	Catalytic	Oxidoreductase
Les.1997.2.S1_at	Calreticulin, putative	5.22584	5.44541	1.16439	0.663341	0.865544		5.93356	9.60273	12.7213	0.000168976	0.0172889	Binding	-
Les.435.1.S1_at	Class III acidic chitinase, putative	8.0459	8.27361	1.17098	0.5963	0.865544		8.2924	11.9614	12.7197	0.000112651	0.0172889	Catalytic	Hydrolase
LesAffx.52594.1.S1_at	Unknown	2.9928	2.99593	1.00217	0.99483	0.884741		4.05232	7.65781	12.172	0.000394277	0.0262215	Others or Unknown	-
LesAffx.9038.3.S1_at	Cytochrome P450, putative	6.23928	5.90525	-1.26053	0.377822	0.865544		6.1007	9.68691	12.0104	0.000112651	0.0172889	Catalytic	Oxidoreductase
LesAffx.16164.1.S1_at	Calcium-binding EF hand family protein, putative	5.7665	5.33474	-1.34888	0.239828	0.865544		5.54662	9.12353	11.9332	0.000168976	0.0172889	Binding	-
Les.4460.1.S1_at	Pathogenesis-related protein P2 (PR-P2)	9.14541	8.41499	-1.65911	0.32087	0.865544		8.83926	12.3934	11.7461	0.000366115	0.0246568	Catalytic	Hydrolase
Les.3635.1.S1_at	Subtilisin-like serine protease (P69B)	4.87969	4.74025	-1.10147	0.652862	0.865544		4.88854	8.35551	11.0577	0.000168976	0.0172889	Catalytic	Hydrolase
Les.3583.1.A1_at	TSI-1 protein (PR-10)	7.79556	7.66159	-1.09731	0.843366	0.86782		7.64797	11.1051	10.9822	0.00129548	0.0499457	Others or Unknown	-
Les.3673.1.S1_at	Acidic extracellular beta-1,3-glucanase (class II) (PR-2a)	2.16408	3.85856	3.23661	0.040968	0.865544		3.20397	6.63138	10.7585	0.00205587	0.0671049	Catalytic	Hydrolase
Les.4222.1.S1_at	Alternative oxidase 1b (AOX1b)	2.60418	0.625522	-3.94127	-	-		2.38559	5.69831	9.93643	0.00264729	0.0782483	Catalytic	Oxidoreductase
LesAffx.39043.1.S1_at	ATP binding / ATPase/ nucleoside-triphosphatase/ nucleotide binding protein	2.77995	2.79468	1.01026	0.985552	0.884538		3.47803	6.77503	9.82873	0.000168976	0.0172889	Catalytic	Hydrolase
LesAffx.38821.1.S1_at	Cytochrome P450, putative	3.66574	3.69779	1.02246	-	-		3.77219	7.06344	9.78961	0.000112651	0.0172889	Catalytic	Oxidoreductase
Les.1997.1.S1_at	Calreticulin, putative	6.6157	6.90191	1.21943	0.380114	0.865544		7.0808	10.3654	9.74482	0.000168976	0.0172889	Binding	-
Les.122.1.S1_at	Class II chitinase	9.45769	8.62721	-1.77828	0.122653	0.865544		8.94552	12.191	9.48378	0.000112651	0.0172889	Catalytic	Hydrolase
Les.1997.3.A1_at	Calreticulin, putative	5.4696	5.64936	1.1327	0.562877	0.865544		5.98491	9.205	9.31846	0.000337952	0.0239739	Binding	-
Les.3460.1.S1_at	Cell-wall invertase (Wiv-1)	5.61428	5.72261	1.07798	0.66513	0.865544		6.06505	9.26936	9.21708	0.00129548	0.0499457	Catalytic	Hydrolase
Les.3662.1.S1_at	Ripening-related ACC synthase 2 (ACS2)	2.39809	2.23808	-1.1173	-	-		3.43378	6.59312	8.93422	0.000704067	0.0367248	Catalytic	Lyase
LesAffx.22812.2.S1_at	Unknown	4.49254	5.23116	1.66858	0.114828	0.865544		4.65956	7.80789	8.86632	0.000112651	0.0172889	Others or Unknown	-
LesAffx.4763.1.S1_at	Methyltransferase, putative	6.75069	7.04621	1.22733	0.343226	0.865544		6.02485	9.13653	8.64388	0.000929368	0.0414184	Catalytic	Transferase
Les.1604.1.A1_at	Similar to Arabidopsis thaliana IRX6 gene, a member of COBRA family and involeved in secondary cell wall biosynthesis	3.7186	3.48369	-1.17683	0.672256	0.865544		4.49043	7.57495	8.48264	0.000168976	0.0172889	Others or Unknown	-
Les.5597.1.S1_at	Disulfide isomerase, putative	1.77824	1.82727	1.03457	-	-		1.67734	4.7481	8.40219	0.000168976	0.0172889	Catalytic	Isomerase
Les.3493.1.S1_at	Phospholipase PLDb1	5.88288	5.38564	-1.41152	0.00500224	0.865544		5.5691	8.61	8.23007	0.000140813	0.0172889	Catalytic	Hydrolase
LesAffx.22100.1.S1_at	Transcription factor, putative	2.83163	2.50061	-1.25791	0.498938	0.865544		4.06623	7.08151	8.08518	0.000619579	0.0336369	Transcription factor	-
Les.3505.1.S1_at	Verticillium wilt disease resistance protein (Ve1)	1.67795	-0.59862	-4.84526	-	-		2.1403	5.09115	7.73209	0.000563253	0.0325733	Binding	-
Les.2544.1.A1_at	Unknown	8.48571	8.04073	-1.3613	0.223955	0.865544		8.13019	10.9782	7.20005	0.000112651	0.0172889	Others or Unknown	-
LesAffx.735.1.S1_at	WRKY-like transcription factor	4.24908	2.97742	-2.41438	-	-		3.77082	6.58685	7.04225	0.000168976	0.0172889	Transcription factor	-
LesAffx.16769.1.S1_at	Unknown	8.93515	8.90259	-1.02282	0.807707	0.86782		8.34411	11.1574	7.02896	0.000112651	0.0172889	Others or Unknown	-
Les.5759.1.S1_at	Transporter, putative	6.99923	6.5958	-1.32265	0.261346	0.865544		7.2021	9.9893	6.90289	0.000168976	0.0172889	Transporter	-
Les.4501.1.S1_at	Glutathione S-transferase-like protein (LOC100134894)	5.42341	5.35716	-1.04699	0.809887	0.86782		6.14017	8.87317	6.64839	0.0027881	0.0815048	Catalytic	Transferase
Les.2137.1.S1_at	EIX receptor 1 (LeEix1)	4.91077	5.1126	1.15015	0.657333	0.865544		4.90522	7.63567	6.63667	0.00185874	0.0625902	Catalytic	Transferase
Les.123.1.S1_at	Putative glutathione S-transferase T2	5.77375	5.96624	1.14274	0.54326	0.865544		6.47205	9.18047	6.53607	0.000168976	0.0172889	Catalytic	Transferase
LesAffx.8720.1.S1_at	Cytochrome P450, putative	2.66744	2.23936	-1.34544	-	-		3.69475	6.39876	6.51612	0.00084488	0.0414184	Catalytic	Oxidoreductase
LesAffx.59625.1.S1_at	Unknown	1.61329	2.16109	1.46186	-	-		3.1975	5.83281	6.21312	0.00219669	0.0683467	Others or Unknown	-
LesAffx.22491.2.A1_at	Flavonoid 3-hydroxylase, putative	6.15838	6.21594	1.04071	0.861838	0.86782		6.54777	9.15402	6.0892	0.000619579	0.0336369	Catalytic	Oxidoreductase
Les.3777.1.S1_at	Wound-induced gene from tomato (twi1). Glucosyltransferase, putative	8.18261	7.86543	-1.2459	0.381455	0.865544		7.92805	10.4643	5.80097	0.000168976	0.0172889	Catalytic	Transferase
Les.4701.1.S1_at	Aldo /keto reductase, putative	5.25132	5.20292	-1.03412	0.585709	0.865544		5.66639	8.19933	5.7875	0.00042244	0.027079	Catalytic	Oxidoreductase
LesAffx.3635.2.A1_at	Calmodulin-binding family protein, putative	4.13987	3.63714	-1.41689	0.189386	0.865544		4.47325	6.94235	5.53697	0.000168976	0.0172889	Binding	-
Les.5567.1.S1_at	Phosphoglycerate/bisphosphoglycerate mutase family protein, putative	4.39795	4.10425	-1.22578	0.521211	0.865544		4.73073	7.19952	5.5358	0.000112651	0.0172889	Catalytic	Isomerase
LesAffx.62617.1.S1_at	N-hydroxycinnamoyl/benzoyltransferase-like protein, putative	2.82156	3.69013	1.82586	-	-		3.89038	6.34551	5.4836	0.00402726	0.0998914	Catalytic	Transferase
Les.2529.2.S1_at	Benzoyl coenzyme A: benzyl alcohol benzoyl transferase, putative. Highly similar to N. tabacum HSR201 protein	8.12194	8.1169	-1.0035	0.972166	0.883112		8.07927	10.5258	5.4511	0.000112651	0.0172889	Catalytic	Transferase
Les.4880.1.S1_at	Cytochrome P450, putative. Highly similar to HSR515 protein	9.44004	9.13842	-1.23253	0.379835	0.865544		9.12135	11.5538	5.39807	0.000140813	0.0172889	Catalytic	Oxidoreductase
LesAffx.36712.1.S1_at	WRKY transcription factor, putative	6.31755	5.3653	-1.93489	0.356025	0.865544		5.64803	8.07186	5.36593	0.000168976	0.0172889	Transcription factor	-
LesAffx.13053.1.S1_at	Aldehyde dehydrogenase, putative	6.00099	6.20004	1.14794	0.25327	0.865544		6.04129	8.46434	5.36303	0.000168976	0.0172889	Catalytic	Oxidoreductase
LesAffx.50533.1.S1_at	Receptor-like serine-threonine protein kinase, putative	4.43402	4.64524	1.15767	0.37282	0.865544		4.31941	6.71301	5.25467	0.000957531	0.0414184	Catalytic	Transferase
LesAffx.57572.1.S1_at	Patatin-like protein/Phospholipase, putative	6.2146	6.40972	1.14482	0.670719	0.865544		5.56884	7.95599	5.23124	0.000112651	0.0172889	Catalytic	Hydrolase
Les.293.1.S1_at	Putative glutathione S-transferase T3	5.8376	5.25561	-1.4969	0.0556394	0.865544		5.69638	8.08344	5.2309	0.000366115	0.0246568	Catalytic	Transferase
LesAffx.344.3.S1_at	Photoassimilate-responsive (PAR) protein, putative	6.48387	6.12294	-1.28425	0.0953778	0.865544		6.35446	8.7218	5.15987	0.000112651	0.0172889	Others or Unknown	-
Les.4924.1.S1_at	Peptide or nitrate transporter, putative	5.0823	4.87486	-1.15464	0.512967	0.865544		5.66398	8.02019	5.12022	0.000309789	0.0232142	Transporter	-
Les.3779.1.S1_at	Class II acidic chitinase. Highly similar to N.tabacum PR-P and PR-Q	9.78133	9.67388	-1.07732	0.676056	0.865544		6.8686	9.20124	5.03726	0.000309789	0.0232142	Catalytic	Hydrolase
Les.3828.1.S1_at	Mannitol dehydrogenase; MTD	5.58044	5.73393	1.11225	0.597613	0.865544		5.84582	8.17496	5.02508	0.00112651	0.0461037	Catalytic	Oxidoreductase
Les.4038.1.S1_at	N-hydroxycinnamoyl-CoA:tyramine N-hydroxycinnamoyl transferase THT1. (THT1-3 or THT1-4)	6.2187	5.49861	-1.64729	0.279091	0.865544		5.88336	8.19584	4.96734	0.00135181	0.0510084	Catalytic	Transferase
Les.797.1.S1_at	AMT1 gene for ammonium transporter	7.80928	7.75419	-1.03892	0.625279	0.865544		7.752	10.0435	4.89558	0.000619579	0.0336369	Transporter	-
Les.3741.1.S1_at	Sinapyl alcohol dehydrogenase or cinnamyl alcohol dehydrogenase, putative (CAD)	4.7318	4.78139	1.03497	0.847194	0.86782		4.39885	6.67923	4.85805	0.000957531	0.0414184	Catalytic	Oxidoreductase
Les.5930.1.S1_at	Short-chain type alcohol dehydrogenase, putative	8.65193	8.22362	-1.34566	0.113235	0.865544		8.86436	11.1199	4.77503	0.000366115	0.0246568	Catalytic	Oxidoreductase
LesAffx.5912.1.A1_at	Cytochrome P450, putative	7.9935	8.15545	1.1188	0.49374	0.865544		8.37426	10.5351	4.47181	0.000619579	0.0336369	Catalytic	Oxidoreductase
Les.4876.1.S1_at	Elongation factor (ef-1alpha), putative	4.84772	5.37076	1.43698	0.100687	0.865544		5.19479	7.34543	4.44026	0.00042244	0.027079	Binding	-
LesAffx.3635.1.S1_at	Calmodulin-binding family protein, putative	4.11743	3.72466	-1.31291	-	-		4.45674	6.60148	4.42214	0.000168976	0.0172889	Binding	-
LesAffx.29801.1.S1_at	2OG-Fe(II) oxygenase, putative	5.59087	5.83217	1.18205	0.340152	0.865544		5.85152	7.88457	4.09269	0.000168976	0.0172889	Catalytic	Oxidoreductase
LesAffx.837.1.S1_at	WRKY transcription factor, putative	8.08691	6.72653	-2.56752	0.050218	0.865544		8.02557	10.0393	4.0382	0.00146446	0.0544862	Transcription factor	-
Les.1175.2.S1_at	Photoassimilate-responsive (PAR) protein, putative	7.24758	6.3484	-1.86501	0.138442	0.865544		7.35124	9.33022	3.94215	0.000168976	0.0172889	Others or Unknown	-
LesAffx.6614.2.S1_at	Membrane protein, putative	3.93088	3.49752	-1.35037	-	-		4.27417	6.21335	3.83487	0.000112651	0.0172889	Others or Unknown	-
Les.3687.1.S1_at	N-hydroxycinnamoyl-CoA:tyramine N-hydroxycinnamoyl transferase THT7-1	7.81895	7.7652	-1.03795	0.829952	0.86782		7.49596	9.41398	3.77903	0.00219669	0.0683467	Catalytic	Transferase
LesAffx.43341.1.S1_at	WRKY transcription factor, putative	7.21416	5.29665	-3.77769	0.0246479	0.865544		7.38866	9.28529	3.72342	0.000168976	0.0172889	Transcription factor	-
LesAffx.66359.1.S1_at	NAC domain protein, putative	5.76369	5.70552	-1.04114	0.783087	0.865544		6.08236	7.96169	3.67904	0.000957531	0.0414184	Transcription factor	-
LesAffx.30145.1.S1_at	Unknown	5.21728	5.78451	1.48167	0.11248	0.865544		5.43507	7.31359	3.67698	0.00171792	0.060132	Others or Unknown	-
LesAffx.71532.1.S1_at	Disease resistance protein-related / LRR protein-related protein, putative	6.44144	6.27709	-1.12066	0.526157	0.865544		6.45445	8.296	3.58394	0.00219669	0.0683467	Others or Unknown	-
Les.3140.3.S1_at	Peroxisomal 3-ketoacyl-CoA thiolase, putative	7.47479	8.25639	1.71905	0.0110943	0.865544		7.52028	9.33801	3.52528	0.000112651	0.0172889	Catalytic	Transferase
Les.73.1.S1_at	Inorganic phosphate transporter (LePT1)	6.8355	6.92364	1.063	0.47865	0.865544		6.23079	8.01892	3.45367	0.000732229	0.0378229	Transporter	-
Les.3774.1.S1_at	Hexose transporter (HT2)	8.74455	8.83536	1.06497	0.465655	0.865544		8.83355	10.6213	3.45273	0.000563253	0.0325733	Transporter	-
Les.3140.2.S1_at	Peroxisomal 3-ketoacyl-CoA thiolase, putative	7.70398	8.38233	1.6003	0.019981	0.865544		7.54487	9.30575	3.38907	0.000168976	0.0172889	Catalytic	Transferase
LesAffx.67592.1.S1_at	Protease inhibitor/seed storage/lipid transfer protein (LTP) family protein, putative	5.03981	5.16883	1.09355	0.680248	0.865544		4.88017	6.62387	3.34892	0.000563253	0.0325733	Binding	-
Les.1013.1.A1_at	Unknown	4.69256	3.57343	-2.17216	0.00637156	0.865544		4.20836	5.9272	3.29171	0.000563253	0.0325733	Others or Unknown	-
Les.2529.1.A1_at	HSR201-like protein, putative. (Which encodes benzoyl coenzyme A: benzyl alcohol benzoyl transferase)	9.58138	9.60643	1.01751	0.827409	0.86782		9.78687	11.5057	3.29167	0.000168976	0.0172889	Catalytic	Transferase
LesAffx.63523.1.S1_at	Transcription factor, putative	4.83582	4.85049	1.01022	0.923793	0.874342		4.74518	6.44039	3.23823	0.000112651	0.0172889	Transcription factor	-
LesAffx.4779.1.S1_at	Peroxidase, putative	7.72558	7.89876	1.12754	0.23871	0.865544		8.13917	9.82936	3.22699	0.00225301	0.0688906	Catalytic	Oxidoreductase
Les.113.1.S1_at	Unknown	7.5548	7.927	1.29433	0.272776	0.865544		7.09101	8.77823	3.22036	0.000197139	0.0194234	Others or Unknown	-
Les.5208.1.S1_at	Enhanced disease susceptibility 1 (EDS1), putative	7.53753	7.07344	-1.37945	0.20294	0.865544		7.17018	8.85449	3.21387	0.000112651	0.0172889	Catalytic	Hydrolase
LesAffx.30683.2.S1_at	Unknown	6.77568	6.19704	-1.49344	0.159345	0.865544		6.85828	8.51793	3.15941	0.00247831	0.0744953	Others or Unknown	-
Les.2747.1.S1_at	Peroxisomal 3-ketoacyl-CoA thiolase, putative	7.4793	7.92082	1.35804	0.12595	0.865544		7.47712	9.13431	3.15403	0.000337952	0.0239739	Catalytic	Transferase
Les.4482.1.S1_at	Ripening regulated protein (DDTFR6/A)	8.74473	8.73503	-1.00674	0.947854	0.880447		9.20042	10.8555	3.14941	0.00109834	0.0452996	Catalytic	Oxidoreductase
LesAffx.1861.2.S1_at	Similar to LeODD for 2-oxoglutarate-dependent dioxygenase	4.37477	4.77404	1.31884	0.158004	0.865544		4.9683	6.60455	3.10857	0.000168976	0.0172889	Catalytic	Oxidoreductase
Les.4483.1.S1_at	NAC domain protein 1 (SlNAC1)	7.18693	7.00121	-1.13738	0.662307	0.865544		6.92383	8.55071	3.08846	0.00343585	0.0927925	Transcription factor	-
LesAffx.30683.1.S1_at	Unknown	5.7035	5.06808	-1.5534	0.299827	0.865544		6.07546	7.68055	3.04215	0.000619579	0.0336369	Others or Unknown	-
Les.3739.1.S1_at	Leer-sHSP mRNA for small heat shock protein	3.9907	3.59746	-1.31334	0.099877	0.865544		3.45173	5.03063	2.98742	0.000168976	0.0172889	Others or Unknown	-
Les.4223.1.S1_at	Alternative oxidase 1a (AOX1a)	6.5972	6.39079	-1.15381	0.414766	0.865544		6.95792	8.51411	2.94077	0.000168976	0.0172889	Catalytic	Oxidoreductase
Les.2747.2.S1_at	Peroxisomal 3-ketoacyl-CoA thiolase, putative	8.20012	8.59122	1.3114	0.0501341	0.865544		8.09167	9.60038	2.84556	0.000168976	0.0172889	Catalytic	Transferase
LesAffx.63523.2.S1_at	Transcription factor, putative	3.72122	3.39832	-1.25084	0.591661	0.865544		3.90676	5.38937	2.79454	0.00343585	0.0927925	Transcription factor	-
Les.5090.1.S1_at	Unknown	9.83033	9.77678	-1.03781	0.749022	0.865544		9.66803	11.1325	2.75955	0.000337952	0.0239739	Others or Unknown	-
LesAffx.70524.1.S1_at	UDP-glucose:glucosyltransferase, putative	3.92462	3.40216	-1.4364	0.269478	0.865544		3.67098	5.10981	2.711	0.000957531	0.0414184	Catalytic	Transferase
LesAffx.3388.1.S1_at	Plant cell wall protein SlTFR88	5.63922	5.62398	-1.01062	0.952828	0.881757		5.73432	7.16024	2.68686	0.000929368	0.0414184	Others or Unknown	-
LesAffx.46036.1.S1_at	Glutathione S-transferase, putative	3.49447	2.74342	-1.68302	0.00486251	0.865544		3.73526	5.1486	2.66353	0.000225301	0.0206671	Catalytic	Transferase
LesAffx.63935.1.S1_at	Matrix metalloprotease (MMP), putative	7.01357	6.3142	-1.6238	0.165521	0.865544		6.50554	7.91649	2.65913	0.00199955	0.0660772	Catalytic	Hydrolase
Les.2467.1.S1_at	Unknown	7.95407	7.68818	-1.20238	0.316007	0.865544		7.32238	8.72845	2.65015	0.00332319	0.0906706	Others or Unknown	-
LesAffx.47116.1.S1_at	PQ-loop repeat family protein / transmembrane family protein, putative	4.72042	4.72093	1.00036	0.996814	0.884741		4.08661	5.48989	2.64504	0.000309789	0.0232142	Others or Unknown	-
LesAffx.71654.1.S1_at	Unknown	7.63681	7.35397	-1.21659	0.426839	0.865544		6.44011	7.805	2.57556	0.000168976	0.0172889	Others or Unknown	-
LesAffx.3081.1.S1_at	Putative membrane protein	9.74064	9.45757	-1.21679	0.2704	0.865544		9.18425	10.5415	2.56196	0.000563253	0.0325733	Others or Unknown	-
Les.4727.1.S1_at	DC1 domain-containing protein, putative	7.70183	7.42322	-1.21303	0.141097	0.865544		7.02648	8.35746	2.51574	0.000788555	0.0395796	Catalytic	Oxidoreductase
Les.2668.2.A1_at	Auxin and ethylene responsive GH3-like protein (GH3), putative	5.21941	5.45333	1.17602	0.699447	0.865544		5.14925	6.47692	2.50996	0.000901205	0.0414184	Catalytic	Ligase
LesAffx.1861.4.S1_at	Similar to LeODD for 2-oxoglutarate-dependent dioxygenase	5.97091	6.0964	1.09088	0.339733	0.865544		6.38431	7.70267	2.49382	0.000225301	0.0206671	Catalytic	Oxidoreductase
Les.5699.1.S1_at	NAC domain containing transcription factor, putative	7.49895	6.47766	-2.02973	0.166862	0.865544		6.35047	7.61834	2.40807	0.000309789	0.0232142	Transcription factor	-
Les.1334.1.A1_at	Protein kinase family protein / glycerophosphoryl diester phosphodiesterase family protein, putative	7.98266	7.68078	-1.23275	0.00838364	0.865544		7.95356	9.21138	2.39133	0.00107018	0.0452996	Catalytic	Transferase
LesAffx.71016.1.S1_at	Unknown	6.31616	6.34861	1.02275	0.91812	0.873006		6.53331	7.7891	2.38798	0.00129548	0.0499457	Others or Unknown	-
LesAffx.10313.1.A1_at	Serine/threonine-protein kinase, putative	6.19076	5.8536	-1.26327	0.0549408	0.865544		6.08496	7.32792	2.36684	0.00168976	0.060132	Catalytic	Transferase
Les.3710.1.S1_at	Alternaria stem canker resistance protein, Asc-1 allele (Asc gene)	5.41736	4.46595	-1.93376	0.194165	0.865544		6.25675	7.49259	2.35519	0.000563253	0.0325733	Others or Unknown	-
LesAffx.269.2.S1_at	MULTIDRUG RESISTANCE-ASSOCIATED PROTEIN (MRP) ; ATPase, coupled to transmembrane movement of substances, putative	7.25658	7.07288	-1.13579	0.390538	0.865544		7.2395	8.46594	2.33988	0.00109834	0.0452996	Transporter	-
Les.5933.1.S1_at	Heavy-metal-associated domain-containing protein, putative	9.28851	8.823	-1.3808	0.171222	0.865544		8.76037	9.95681	2.29174	0.00180241	0.0618682	Binding	-
LesAffx.71544.1.S1_at	Unknown	6.46441	6.18859	-1.21068	0.456517	0.865544		6.08392	7.27165	2.27794	0.00177425	0.0616976	Others or Unknown	-
LesAffx.37916.1.S1_at	Unknown	6.405	5.23269	-2.25372	0.117036	0.865544		5.79062	6.96214	2.25249	0.0037738	0.0972876	Others or Unknown	-
Les.3383.1.S1_at	4-coumarate-CoA ligase, putative (4CL)	6.40825	6.41366	1.00376	0.959088	0.882009		7.27709	8.44617	2.24868	0.000168976	0.0172889	Catalytic	Ligase
Les.5240.1.S1_at	Serine protease SBT3	7.87803	8.05968	1.13418	0.309636	0.865544		7.99254	9.15278	2.23495	0.000168976	0.0172889	Catalytic	Hydrolase
Les.546.1.A1_at	WRKY transcription factor IId-4	7.81553	7.6517	-1.12025	0.314079	0.865544		7.80467	8.9384	2.19425	0.000704067	0.0367248	Transcription factor	-
Les.3358.3.S1_at	Arginine decarboxylase (adc1 gene)	7.42251	7.41148	-1.00767	0.901548	0.870932		7.26006	8.38155	2.17572	0.00163343	0.0591194	Catalytic	Lyase
Les.5443.1.S1_at	Hydrolase, acting on glycosyl bonds / mannosyl-glycoprotein endo-beta-N-acetylglucosaminidase, putative	5.94928	6.10639	1.11505	0.489241	0.865544		6.08623	7.20622	2.17345	0.000366115	0.0246568	Catalytic	Hydrolase
LesAffx.56130.1.S1_at	Kinase, putative	5.43578	5.37516	-1.04291	0.596384	0.865544		5.83586	6.95307	2.16926	0.00205587	0.0671049	Catalytic	Transferase
Les.2765.2.S1_at	Hypersensitive-induced reaction protein ; band 7 family protein, putative	7.51597	7.37993	-1.09888	0.533674	0.865544		7.46362	8.56842	2.15069	0.00287259	0.0825306	Binding	-
LesAffx.34973.1.S1_at	Unknown	4.24761	2.85208	-2.63085	-	-		3.95018	5.05114	2.14497	0.000619579	0.0336369	Others or Unknown	-
LesAffx.66215.2.S1_at	Aspartic-type endopeptidase, putative	5.91011	6.03357	1.08935	0.445199	0.865544		5.75014	6.82235	2.10266	0.0021122	0.0676975	Catalytic	Hydrolase
LesAffx.18587.1.S1_at	Similar to hsr203J (cell death associated protein)	10.787	10.8383	1.03619	0.697994	0.865544		10.332	11.3876	2.07857	0.000309789	0.0232142	Others or Unknown	-
Les.3486.1.S1_at	Auxin-regulated protein	7.70551	6.6604	-2.06353	0.230159	0.865544		6.97078	8.00816	2.05249	0.00352033	0.0945941	Others or Unknown	-
Les.4735.1.S1_at	3-hydroxy-3-methylglutaryl coenzyme A synthase (HMGS)	9.08655	9.12326	1.02577	0.734714	0.865544		9.24098	10.2693	2.03966	0.000788555	0.0395796	Catalytic	Transferase
Les.5884.1.S1_at	Unknown	6.08071	5.82111	-1.19714	0.367874	0.865544		5.15661	6.18438	2.03887	0.0037738	0.0972876	Others or Unknown	-
Les.5205.1.S1_at	Receptor-like protein kinase, putative	9.0438	8.56095	-1.3975	0.345601	0.865544		8.77072	9.79805	2.03825	0.00109834	0.0452996	Catalytic	Transferase
Les.4496.1.S1_at	PR-10 family tomato TSI-1 protein, which function is presumably RNase	10.6068	10.5776	-1.02038	0.871563	0.869084		10.8434	11.8603	2.02355	0.0025628	0.0761742	Others or Unknown	-
Les.3494.1.S1_at	Phospholipase PLDa2	4.73394	4.5125	-1.16589	0.256372	0.865544		4.22896	5.24378	2.02066	0.00360482	0.0954186	Catalytic	Hydrolase
LesAffx.49809.1.S1_at	Haloacid dehalogenase-like hydrolase family protein, putative	7.04914	7.03352	-1.01089	0.946484	0.879795		6.85501	7.86377	2.01218	0.000337952	0.0239739	Catalytic	Hydrolase
Les.3018.1.S1_at	Beta-cyanoalanine synthase, putative	9.13848	9.27771	1.10132	0.284485	0.865544		9.65951	10.6634	2.0054	0.00405542	0.0998914	Catalytic	Lyase
Les.63.1.S1_at	Gibberellin 20-oxidase-3 (GA20OX3)	5.93964	6.66762	1.65631	0.181506	0.865544		6.13117	3.70901	-5.35971	0.00129548	0.0499457	Catalytic	Oxidoreductase
LesAffx.62334.1.S1_at	Transcription factor style2.1, putative	7.19996	7.4222	1.16654	0.467276	0.865544		7.41439	5.82156	-3.0164	0.000647741	0.0344625	Transcription factor	-
Les.2026.2.A1_at	Protein binding / ubiquitin-protein ligase/ zinc ion binding protein, putative	7.73406	7.66416	-1.04965	0.839733	0.86782		7.34407	5.81811	-2.87978	0.0037738	0.0972876	Catalytic	Ligase
LesAffx.44395.1.S1_at	Unknown	7.43659	7.62916	1.1428	0.276911	0.865544		7.75706	6.57616	-2.26718	0.00385829	0.0972876	Others or Unknown	-
LesAffx.42063.1.S1_at	Unknown	4.65042	4.9184	1.20412	0.280824	0.865544		4.64956	3.47012	-2.26489	0.00171792	0.060132	Others or Unknown	-
Les.4982.1.S1_at	MYB domain containing DNA binding / transcription factor, putative	6.05811	5.96931	-1.06348	0.658926	0.865544		5.98444	4.81023	-2.2567	0.0021122	0.0676975	Transcription factor	-
Les.2261.1.A1_at	Receptor-like kinase, putative	7.06731	7.31427	1.1867	0.221496	0.865544		8.06254	6.93429	-2.18593	0.00126732	0.0499457	Catalytic	Transferase
LesAffx.32198.1.S1_at	Methyl transferase-like protein, putative	6.75821	6.13663	-1.53856	0.00620389	0.865544		6.77041	5.68598	-2.12054	0.000563253	0.0325733	Catalytic	Transferase
Les.415.1.A1_at	Neryl diphosphate synthase 1 (NDPS1)	10.0211	9.84695	-1.12831	0.0929745	0.865544		9.90037	8.82427	-2.10833	0.00109834	0.0452996	Catalytic	Transferase
LesAffx.48646.1.S1_at	Malate synthase	6.37278	6.4168	1.03098	0.724262	0.865544		7.04222	6.04034	-2.00261	0.000309789	0.0232142	Catalytic	Transferase
a Determined using appropriate web tools including NCBI BLAST.
b Logarithmic signal intensity of each gene in mock- or R. solanacearum (R.s)-inoculated tomato stems at 1 dpi.
c Fold-change between mock- and R. solanacearum-inoculation, using fold-regulation cutoff of >2.0.
d Obtained using Significance Analysis of Microarrays (Tusher et al. 2001); P < 0.01.
e Derived using method of Storey and Tibshirani (2003); q < 0.1.
f Classified functional groups based on the information of Molecular Function in Gene Ontology.
Genes with '-' in P value and q value columns were removed genes from statistical analysis because their 'present' calls were less than 3.
